# Supplementary material for: Rapid and High-Throughput Evaluation of Diverse Configurations of Engineered Lysins Using the VersaTile Technique
Source: MDPI journal article supplement (doi:10.3390/antibiotics10030293), 2021-03-11
Supplement: s1 [file s1]

**Table S2. The total number of tiles per type of building block and per possible position.** The numbers correspond to the numbers in Table S3, which provides a more detailed description of each tile.

| OMPs  |       |       |       | Linkers |       | CBDs  |       |       | EADs  |       |       |
|-------|-------|-------|-------|---------|-------|-------|-------|-------|-------|-------|-------|
| Pos 1 | Pos 2 | Pos 3 | Pos 4 | Pos 2   | Pos 3 | Pos 1 | Pos 2 | Pos 3 | Pos 2 | Pos 3 | Pos 4 |
| 1     | 1     |       | 1     | 1       | 1     | 1     | 1     | 1     | 1     | 1     | 1     |
| 2     | 2     |       | 2     | 2       |       |       | 2     | 2     |       | 2     | 2     |
| 3     | 3     | 3     | 3     | 3       | 3     | 3     | 3     | 3     | 3     | 3     | 3     |
| 4     | 4     | 4     | 4     | 4       | 4     |       | 4     | 4     |       | 4     | 4     |
| 5     | 5     |       | 5     | 5       | 5     | 5     | 5     | 5     |       | 5     | 5     |
| 6     | 6     | 6     | 6     | 6       | 6     | 6     | 6     | 6     | 6     | 6     | 6     |
| 7     | 7     | 7     | 7     | 7       | 7     |       |       |       | 7     | 7     | 7     |
| 8     | 8     | 8     | 8     |         |       |       |       |       |       | 8     | 8     |
| 9     |       | 9     | 9     |         |       |       |       |       | 9     | 9     | 9     |
| 10    | 10    | 10    | 10    |         |       |       |       |       | 10    | 10    | 10    |
| 11    | 11    | 11    | 11    |         |       |       |       |       |       | 11    | 11    |
| 12    | 12    | 12    | 12    |         |       |       |       |       | 12    | 12    | 12    |
| 13    | 13    | 13    | 13    |         |       |       |       |       | 13    | 13    | 13    |
| 14    | 14    | 14    | 14    |         |       |       |       |       | 14    | 14    | 14    |
| 15    |       |       | 15    |         |       |       |       |       | 15    | 15    | 15    |
| 16    | 16    | 16    | 16    |         |       |       |       |       | 16    | 16    | 16    |
| 17    |       |       | 17    |         |       |       |       |       | 17    | 17    | 17    |
| 18    | 18    | 18    | 18    |         |       |       |       |       |       | 18    | 18    |
| 19    |       |       | 19    |         |       |       |       |       |       | 19    | 19    |
| 20    |       |       |       |         |       |       |       |       |       | 20    | 20    |
| 21    | 21    | 21    | 21    |         |       |       |       |       |       | 21    | 21    |
| 22    | 22    | 22    | 22    |         |       |       |       |       |       | 22    | 22    |
| 23    | 23    | 23    | 23    |         |       |       |       |       |       | 40    | 40    |
| 24    |       | 24    |       |         |       |       |       |       |       |       |       |
| 25    | 25    | 25    | 25    |         |       |       |       |       |       |       |       |
| 26    | 26    | 26    | 26    |         |       |       |       |       |       |       |       |
| 27    |       | 27    | 27    |         |       |       |       |       |       |       |       |
| 28    | 28    | 28    | 28    |         |       |       |       |       |       |       |       |
| 29    | 29    |       | 29    |         |       |       |       |       |       |       |       |
| 30    | 30    | 30    |       |         |       |       |       |       |       |       |       |
| 31    |       |       |       |         |       |       |       |       |       |       |       |
| 32    | 32    |       | 32    |         |       |       |       |       |       |       |       |
| 33    | 33    | 33    | 33    |         |       |       |       |       |       |       |       |
| 34    |       |       |       |         |       |       |       |       |       |       |       |
| 35    |       |       | 35    |         |       |       |       |       |       |       |       |
| 36    |       |       | 36    |         |       |       |       |       |       |       |       |
| 37    |       | 37    | 37    |         |       |       |       |       |       |       |       |
| 38    |       |       |       |         |       |       |       |       |       |       |       |
| 39    |       |       |       |         |       |       |       |       |       |       |       |
| 40    |       | 40    | 40    |         |       |       |       |       |       |       |       |
| 41    | 41    | 41    | 41    |         |       |       |       |       |       |       |       |
| 42    | 42    | 42    | 42    |         |       |       |       |       |       |       |       |
