# Supplementary material for: Rapid and High-Throughput Evaluation of Diverse Configurations of Engineered Lysins Using the VersaTile Technique
Source: MDPI journal article supplement (doi:10.3390/antibiotics10030293), 2021-03-11
Supplement: s1 [file s1]

**Table S1. Primers designed for the construction of new linker tiles.** The primers partially overlap and through hybridization they serve as template for the following step.

| Lin<br>ker | Primer sequence                                                    |                                      |
|------------|--------------------------------------------------------------------|--------------------------------------|
|            | Forward                                                            | Reverse                              |
| 3          | 5'-CTGTCTCGTTTCTTCCACGCGGAAGT-3'                                   | 5'-CAGTTCCGCGTGGAAGAAACGAGACAG-3'    |
|            | 5'-                                                                | 5'-                                  |
| 4          | GTTTCAACCAGCGTAAAGAACACAAAGGTTA                                    | CGCCAGCATGTAAACCTTTGTGTTCTTTACGCTGGT |
|            | CATGCTGGCG-3'                                                      | TGAAAAC-3'                           |
|            | 5'-                                                                | 5'-                                  |
| 5          | ATCCCGCAGGGTCGTTCTCACCCGGTTCAGCCG                                  | GAACGCACCCGGGTACGGCTGAACCGGGTGAGA    |
|            | TACCCGGGTGCGTTC-3'                                                 | ACGACCCTGCGGGAT-3'                   |
| 6          | 5'-CCGGCGGTTCCGCCCGCG-3'                                           | 5'-CGGCGGCGGAACCGCCGG-3'             |
|            | 5'-                                                                | 5'-                                  |
| 7          | GAAGCGGCGGCGAAAGAAGCGGCGAAAGAAGTTTCGCCGCTTCTTTCGCCGCTTCTTTCGCCGCCG | CGGCGAAA-3'                          |
|            | CGGCGAAA-3'                                                        | CTTC-3'                              |
