# Supplementary material for: Rapid and High-Throughput Evaluation of Diverse Configurations of Engineered Lysins Using the VersaTile Technique
Source: MDPI journal article supplement (doi:10.3390/antibiotics10030293), 2021-03-11
Supplement: s1 [file s1]

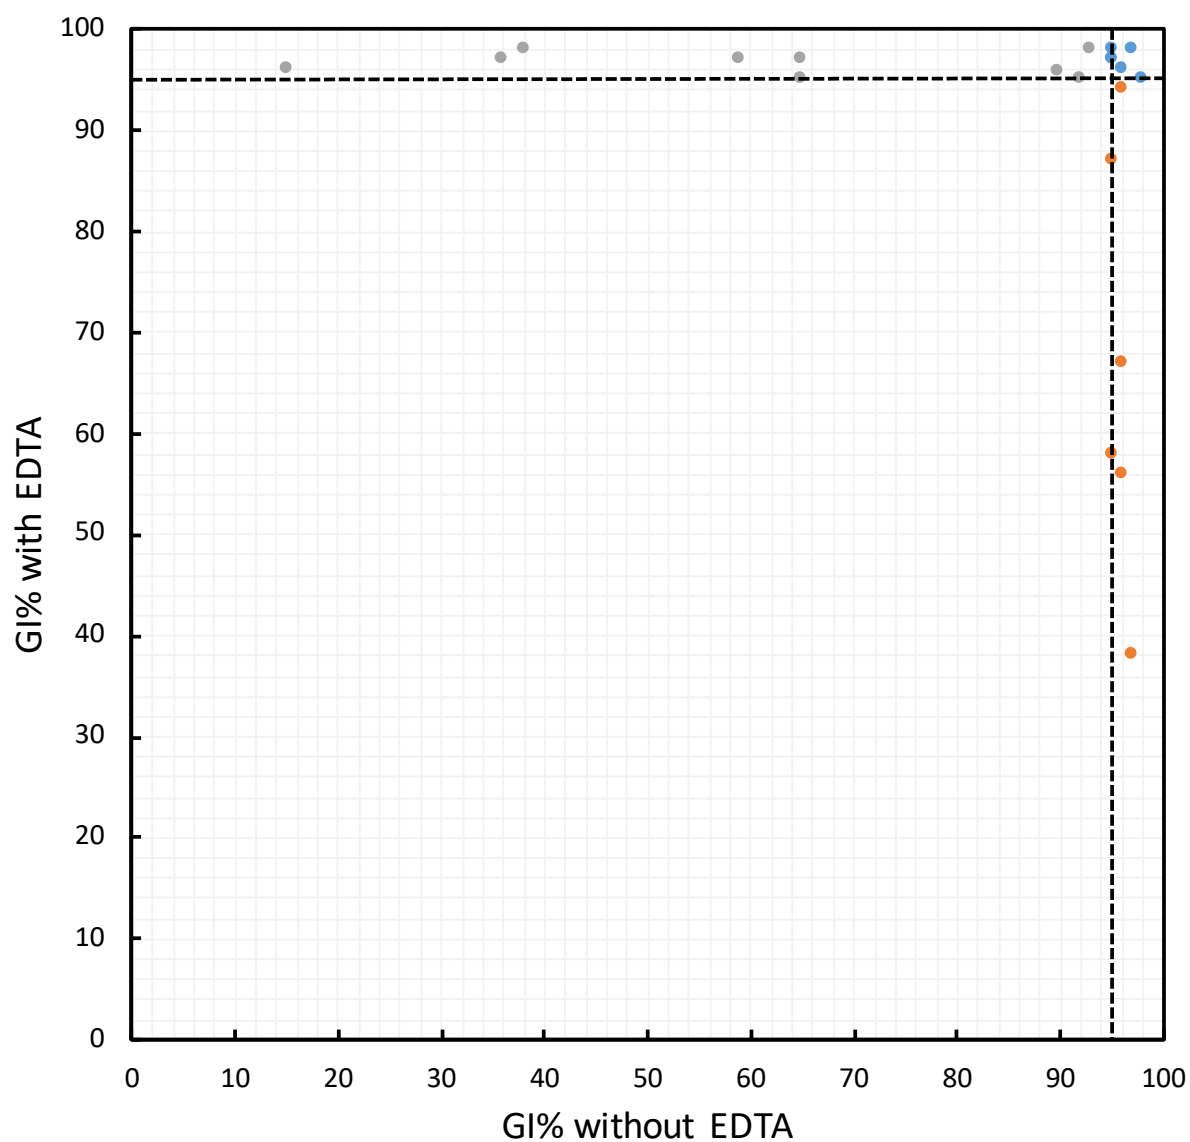

**Figure S2. Growth inhibition percentages of selected hits of configuration 4.** All selected hits from configuration 4 ( $n = 21$ ) have at least 95% growth inhibition (GI%) either only in the absence of EDTA (orange;  $n = 6$ ), the presence of EDTA (grey;  $n = 9$ ) or in both the absence and presence of EDTA (blue;  $n = 6$ )
