# Supplementary material for: Rapid and High-Throughput Evaluation of Diverse Configurations of Engineered Lysins Using the VersaTile Technique
Source: MDPI journal article supplement (doi:10.3390/antibiotics10030293), 2021-03-11
Supplement: s1 [file s1]

**Table S4. A list of the sequenced active constructs of configuration 1, supplemented with the sequences and numbers of their separate tiles and the growth inhibition percentages in absence and presence of EDTA.**

| Nr | OMP                          | Linker                 | CBD                | EAD              | OMP   | Linker | CBD  | EAD   | GI%<br>without<br>EDTA | GI% with<br>EDTA |
|----|------------------------------|------------------------|--------------------|------------------|-------|--------|------|-------|------------------------|------------------|
| 1  | Cathelicidin-BF              | Rigid, optimal helix   | KZ144-CBD          | EL188-EAD        | OMP35 | link7  | CBD1 | EAD9  | 97                     | 98               |
| 2  | Cathelicidin-BF              | Rigid short coil       | EL188-CBD          | KZgp181          | OMP35 | link6  | CBD2 | EAD19 | 0                      | 99               |
| 3  | Cathelicidin-BF              | Rigid, optimal helix   | KZ144-CBD          | KZgp181          | OMP35 | link7  | CBD1 | EAD19 | 100                    | 99               |
| 4  | Cecropin A (D. melanogaster) | Flexible median linker | PVP-SE1gp146-CBD   | EL188-EAD        | OMP10 | link2  | CBD3 | EAD9  | 95                     | 41               |
| 5  | Cecropin P1                  | Rigid short coil       | PVP-SE1gp146-CBD   | 201j2-1gp229-EAD | OMP6  | link6  | CBD3 | EAD12 | 97                     | 96               |
| 6  | CecropinA(A.aegypti)A        | Rigid long helix       | 201phi2-1gp229-CBD | XccBgp35         | OMP7  | link4  | CBD5 | EAD15 | 97                     | 91               |
| 7  | Chrysopsin-1                 | Rigid short coil       | OBPgp279-CBD       | Phage2b.1bgp019  | OMP20 | link6  | CBD4 | EAD14 | 96                     | 96               |
| 8  | Chrysopsin-1                 | Rigid short coil       | OBPgp279-CBD       | Phage2b.1bgp019  | OMP20 | link6  | CBD4 | EAD14 | 96                     | 96               |
| 9  | Chrysopsin-1                 | Rigid short coil       | EL188-CBD          | PsP3gp10         | OMP20 | link6  | CBD2 | EAD1  | 96                     | 40               |
| 10 | Chrysopsin-1                 | Rigid short helix      | KZ144-CBD          | Phage2b.1bgp019  | OMP20 | link3  | CBD1 | EAD13 | 98                     | 99               |
| 11 | E7K_I9K_IsCT                 | Flexible median linker | KZ144-CBD          | 201j2-1gp229-EAD | OMP36 | link2  | CBD1 | EAD12 | 97                     | 95               |
| 12 | Epinecidin                   | Rigid short helix      | EL188-CBD          | KZ144-EAD        | OMP41 | link3  | CBD2 | EAD8  | 61                     | 97               |
| 13 | Fowlicidin-2                 | Rigid short coil       | PVP-SE1gp146-CBD   | EL188-EAD        | OMP34 | link6  | CBD3 | EAD9  | 37                     | 100              |
| 14 | Fowlicidin-2                 | Rigid short coil       | 201phi2-1gp229-CBD | BcepC6Bgp16      | OMP34 | link6  | CBD5 | EAD20 | 99                     | 57               |
| 15 | IR2                          | Rigid short coil       | KZ144-CBD          | BcepC6Bgp16      | OMP26 | link4  | CBD1 | EAD20 | 95                     | 94               |
| 16 | IR2                          | Rigid short coil       | KZ144-CBD          | KZgp181          | OMP26 | link6  | CBD1 | EAD19 | 63                     | 100              |
| 17 | LfcinB                       | Rigid short coil       | PVP-SE1gp146-CBD   | LUZ24gp67        | OMP29 | link6  | CBD3 | EAD5  | 52                     | 98               |
| 18 | LfcinB                       | Rigid short coil       | EL188-CBD          | LUZ24gp67        | OMP29 | link6  | CBD2 | EAD5  | 76                     | 96               |
| 19 | LL-37                        | Flexible median linker | EL188-CBD          | KMVgp36C         | OMP2  | link2  | CBD2 | EAD18 | 17                     | 96               |
| 20 | Magainin                     | Rigid short coil       | OBPgp279-CBD       | CR8gp3.5         | OMP5  | link6  | CBD4 | EAD4  | 22                     | 97               |
| 21 | Magainin                     | Rigid long helix       | OBPgp279-CBD       | 201j2-1gp229-EAD | OMP5  | link4  | CBD4 | EAD12 | 97                     | 97               |
| 22 | Magainin                     | Rigid long helix       | 201phi2-1gp229-CBD | KMVgp36C         | OMP5  | link4  | CBD5 | EAD18 | 97                     | 97               |
| 23 | Melittin                     | Rigid long coil        | KZ144-CBD w/Ser    | KZgp181          | OMP17 | link5  | CBD6 | EAD19 | 100                    | 100              |
| 24 | Melittin                     | Rigid short helix      | KZ144-CBD w/Ser    | EL188-EAD        | OMP17 | link3  | CBD6 | EAD9  | 99                     | 24               |
| 25 | Nigrocin 2                   | Rigid short coil       | 201phi2-1gp229-CBD | Phage2b.1bgp019  | OMP12 | link6  | CBD5 | EAD14 | 97                     | 97               |
| 26 | NRC-13                       | Rigid, optimal helix   | EL188-CBD          | KZ144-EAD        | OMP24 | link7  | CBD2 | EAD8  | 95                     | 94               |

|    |           |                        |                    |                   |       |       |      |       |     |    |
|----|-----------|------------------------|--------------------|-------------------|-------|-------|------|-------|-----|----|
| 27 | NRC-13    | Flexible short linker  | EL188-CBD          | CR8gp3.5          | OMP24 | link1 | CBD2 | EAD4  | 96  | 93 |
| 28 | PAM2      | Rigid long coil        | PVP-SE1gp146-CBD   | KZgp181           | OMP23 | link5 | CBD3 | EAD19 | 46  | 99 |
| 29 | Protegrin | Rigid long helix       | OBPgp279-CBD       | PVP-SE1gp146-EAD  | OMP3  | link4 | CBD4 | EAD10 | 0   | 96 |
| 30 | Protegrin | Flexible short linker  | KZ144-CBD          | KZgp181           | OMP3  | link1 | CBD1 | EAD19 | 0   | 95 |
| 31 | Protegrin | Rigid short coil       | EL188-CBD          | OBPgp279-EAD      | OMP3  | link6 | CBD2 | EAD11 | 0   | 95 |
| 32 | Protegrin | Rigid long coil        | KZ144-CBD          | PVP-SE1gp146-EAD  | OMP3  | link5 | CBD1 | EAD10 | 10  | 96 |
| 33 | Protegrin | Rigid short coil       | PVP-SE1gp146-CBD   | LUZ24gp67         | OMP3  | link6 | CBD3 | EAD5  | 100 | 46 |
| 34 | Protegrin | Rigid long helix       | PVP-SE1gp146-CBD   | Phage003/011gp040 | OMP3  | link4 | CBD3 | EAD16 | 11  | 99 |
| 35 | Protegrin | Rigid short coil       | PVP-SE1gp146-CBD   | EL188-EAD         | OMP3  | link6 | CBD3 | EAD9  | 87  | 97 |
| 36 | Protegrin | Flexible median linker | OBPgp279-CBD       | PVP-SE1gp146-EAD  | OMP3  | link2 | CBD4 | EAD10 | 88  | 97 |
| 37 | Protegrin | Flexible median linker | KZ144-CBD          | PVP-SE1gp146-EAD  | OMP3  | link2 | CBD1 | EAD10 | 91  | 95 |
| 38 | Protegrin | Rigid, optimal helix   | KZ144-CBD          | Phage2b.1bgp019   | OMP3  | link7 | CBD1 | EAD14 | 95  | 96 |
| 39 | Protegrin | Flexible median linker | PVP-SE1gp146-CBD   | KZgp181           | OMP3  | link2 | CBD3 | EAD19 | 95  | 94 |
| 40 | Protegrin | Rigid, optimal helix   | 201phi2-1gp229-CBD | Phage2b.1bgp019   | OMP3  | link7 | CBD5 | EAD15 | 96  | 40 |
| 41 | Protegrin | Flexible median linker | PVP-SE1gp146-CBD   | BcepC6Bgp16       | OMP3  | link2 | CBD3 | EAD20 | 97  | 95 |
| 42 | Protegrin | Rigid long coil        | PVP-SE1gp146-CBD   | EL188-EAD         | OMP3  | link5 | CBD3 | EAD9  | 97  | 92 |
| 43 | Protegrin | Rigid long coil        | 201phi2-1gp229-CBD | LUZ24gp67         | OMP3  | link5 | CBD5 | EAD5  | 99  | 63 |
| 44 | Pseudin 1 | Rigid long helix       | 201phi2-1gp229-CBD | KZ144-EAD         | OMP15 | link4 | CBD5 | EAD8  | 100 | 60 |
| 45 | Ranalexin | Rigid long helix       | EL188-CBD          | KMVgp36C          | OMP14 | link4 | CBD2 | EAD18 | 98  | 99 |
| 46 | Ranalexin | Rigid long helix       | 201phi2-1gp229-CBD | 201j2-1gp229-EAD  | OMP14 | link4 | CBD5 | EAD12 | 99  | 61 |
| 47 | SMAP-29   | Rigid long helix       | 201phi2-1gp229-CBD | OBPgp149          | OMP1  | link4 | CBD5 | EAD40 | 100 | 67 |
| 48 | SSL-25    | Rigid, optimal helix   | OBPgp279-CBD       | LUZ24gp67         | OMP42 | link7 | CBD4 | EAD5  | 97  | 89 |
| 49 | Sushi 1   | Rigid, optimal helix   | 201phi2-1gp229-CBD | LUZ24gp67         | OMP16 | link7 | CBD5 | EAD5  | 0   | 99 |
| 50 | Sushi 1   | Rigid short coil       | KZ144-CBD w/Ser    | KZgp181           | OMP16 | link6 | CBD6 | EAD19 | 0   | 96 |
| 51 | TB_KKG6A  | Rigid short coil       | 201phi2-1gp229-CBD | LUZ24gp67         | OMP31 | link6 | CBD5 | EAD5  | 86  | 97 |
| 52 | TB_KKG6A  | Flexible median linker | PVP-SE1gp146-CBD   | OBPgp149          | OMP31 | link2 | CBD3 | EAD40 | 95  | 96 |
| 53 | TP4       | Rigid long helix       | KZ144-CBD          | 201j2-1gp229-EAD  | OMP18 | link4 | CBD1 | EAD12 | 96  | 97 |
