# Supplementary material for: Rapid and High-Throughput Evaluation of Diverse Configurations of Engineered Lysins Using the VersaTile Technique
Source: MDPI journal article supplement (doi:10.3390/antibiotics10030293), 2021-03-11
Supplement: s1 [file s1]

**Table S3. Detailed description of each tile.** The description and origin of the tile and the accession number and reference in literature are given, as well as the positions in the tile repository.

| Code  | Description                                             | Origin                                              | Accession number          | Reference                                                                                                 | Positions |
|-------|---------------------------------------------------------|-----------------------------------------------------|---------------------------|-----------------------------------------------------------------------------------------------------------|-----------|
| OMP1  | SMAP-29, Sheep myeloid antimicrobial peptide            | Leukocytes of <i>Ovis aries</i>                     | <a href="#">AAA85470</a>  | <a href="https://doi.org/10.1016/S0014-5793(99)01600-2">https://doi.org/10.1016/S0014-5793(99)01600-2</a> | 1,2,4     |
| OMP2  | LL-37, Cathelicidin antimicrobial peptide preproprotein | Neutrophil specific granules of <i>Homo sapiens</i> | <a href="#">NP_004336</a> | <a href="https://doi.org/10.1016/j.bbamem.2015.11.003">https://doi.org/10.1016/j.bbamem.2015.11.003</a>   | 1,2,4     |
| OMP3  | Protegrin-1, Chain A                                    | Leukocytes of <i>Sus scrofa</i>                     | <a href="#">AAB27599</a>  | <a href="https://doi.org/10.1016/S1074-5521(96)90145-3">https://doi.org/10.1016/S1074-5521(96)90145-3</a> | 1,2,3,4   |
| OMP4  | Indolicidin, Cathelicidin-4 precursor                   | Neutrophils of <i>Bos taurus</i>                    | <a href="#">NP_777252</a> | <a href="https://doi.org/10.1016/j.bbrc.2003.08.095">https://doi.org/10.1016/j.bbrc.2003.08.095</a>       | 1,2,3,4   |
| OMP5  | Magainin-2, Chain A                                     | Skin of <i>Xenopus laevis</i>                       | <a href="#">2LSA_A</a>    | <a href="https://doi.org/10.3390/ijms19103041">https://doi.org/10.3390/ijms19103041</a>                   | 1,2,4     |
| OMP6  | Cecropin P1                                             | <i>Ascaris suum</i>                                 | <a href="#">BAD89085</a>  | <a href="http://doi.org/10.1042/BJ20050218">http://doi.org/10.1042/BJ20050218</a>                         | 1,2,3,4   |
| OMP7  | Cecropin A                                              | <i>Aedes aegypti</i>                                | <a href="#">AAF59831</a>  | <a href="http://doi.org/10.1128/AAC.44.3.602-607.2000">http://doi.org/10.1128/AAC.44.3.602-607.2000</a>   | 1,2,3,4   |
| OMP8  | Pleurocidin precursor                                   | Skin of <i>Pseudopleuronectes americanus</i>        | <a href="#">P81941</a>    | <a href="https://doi.org/10.1038/mi.2013.37">https://doi.org/10.1038/mi.2013.37</a>                       | 1,2,3,4   |
| OMP9  | Buforin II                                              | Stomach of <i>Bufo bufo</i>                         | <a href="#">AAB36002</a>  | <a href="https://doi.org/10.1006/bbrc.1998.8159">https://doi.org/10.1006/bbrc.1998.8159</a>               | 1,3,4     |
| OMP10 | Cecropin A2                                             | <i>Drosophila melanogaster</i>                      | <a href="#">BAA28742</a>  | <a href="http://doi.org/10.1128/AAC.00686-17">http://doi.org/10.1128/AAC.00686-17</a>                     | 1,2,3,4   |
| OMP11 | Sarcotoxin IA                                           | Larva of <i>Sarcophaga peregrina</i>                | <a href="#">AAA29988</a>  | <a href="https://doi.org/10.1016/S1046-5928(02)00697-6">https://doi.org/10.1016/S1046-5928(02)00697-6</a> | 1,2,3,4   |
| OMP12 | Nigrocin-2                                              | Skin of <i>Pelophylax nigromaculatus</i>            | <a href="#">P0C009</a>    | <a href="https://doi.org/10.1016/S0014-5793(01)02956-8">https://doi.org/10.1016/S0014-5793(01)02956-8</a> | 1,2,3,4   |
| OMP13 | Ascaphin-5                                              | Skin of <i>Ascaphus truei</i>                       | <a href="#">P0CJ29</a>    | <a href="https://doi.org/10.1016/j.bbrc.2004.05.141">https://doi.org/10.1016/j.bbrc.2004.05.141</a>       | 1,2,3,4   |
| OMP14 | Ranaxalexin                                             | Skin of <i>Rana catesbeiana</i>                     | <a href="#">P39084</a>    | <a href="http://www.jbc.org/content/269/14/10849.long">http://www.jbc.org/content/269/14/10849.long</a>   | 1,2,3,4   |
| OMP15 | Pseudin-1                                               | Skin of <i>Pseudis paradoxa</i>                     | <a href="#">P83188</a>    | <a href="https://doi.org/10.1006/bbrc.2001.5884">https://doi.org/10.1006/bbrc.2001.5884</a>               | 1,4       |
| OMP16 | Sushi 1, Derived from factor C                          | <i>Carcinoscorpius rotundicauda</i>                 | <a href="#">AAB34362</a>  | <a href="https://doi.org/10.1007/s00018-008-7456-0">https://doi.org/10.1007/s00018-008-7456-0</a>         | 1,2,3,4   |
| OMP17 | Melittin                                                | Venom of <i>Apis mellifera</i>                      | <a href="#">670043A</a>   | <a href="https://doi.org/10.3892/mmr.2015.4275">https://doi.org/10.3892/mmr.2015.4275</a>                 | 1,4       |

|       |                                            |                                                            |                                           |                                                                                                                           |         |
|-------|--------------------------------------------|------------------------------------------------------------|-------------------------------------------|---------------------------------------------------------------------------------------------------------------------------|---------|
| OMP18 | TP4, Tilapia piscidin 4                    | Gills of <i>Oreochromis niloticus</i>                      | <a href="#">5H2S A</a>                    | <a href="https://doi.org/10.1016/j.cbpb.2008.12.018">https://doi.org/10.1016/j.cbpb.2008.12.018</a>                       | 1,2,3,4 |
| OMP19 | Ci-MAM-A24, Molecule against microbes A    | Haemocytes of <i>Ciona intestinalis</i>                    | <a href="#">ACA97856</a>                  | <a href="https://doi.org/10.1042/BJ20080398">https://doi.org/10.1042/BJ20080398</a>                                       | 1,4     |
| OMP20 | Chrysophsin-1                              | Gills of <i>Pagrus major</i>                               | <a href="#">P83545</a>                    | <a href="https://doi.org/10.1046/j.1432-1033.2003.03419.x">https://doi.org/10.1046/j.1432-1033.2003.03419.x</a>           | 1       |
| OMP21 | Piscidin-like peptide                      | Spleen of <i>Larimichthys crocea</i>                       | <a href="#">ACE78289</a>                  | <a href="https://www.ncbi.nlm.nih.gov/pmc/articles/PMC5359322/">https://www.ncbi.nlm.nih.gov/pmc/articles/PMC5359322/</a> | 1,2,3,4 |
| OMP22 | Myxinidin                                  | Derived from epidermal mucus of <i>Myxine glutinosa</i> L. | Protein sequence: GIHDILKYGKPS            | <a href="https://doi.org/10.1007/s10126-009-9189-y">https://doi.org/10.1007/s10126-009-9189-y</a>                         | 1,2,3,4 |
| OMP23 | PAM2, <i>Platypus</i> cathelicidin peptide | Identified in <i>Platypus</i> genome using bioinformatics  | Protein sequence: RPWAGNGSVHRYTVLSPRLKTQ  | <a href="https://doi.org/10.1371/journal.pone.0024030">https://doi.org/10.1371/journal.pone.0024030</a>                   | 1,2,3,4 |
| OMP24 | NRC-13, Pleurocidin-like peptide AP3       | <i>Hippoglossoides platessoides</i>                        | <a href="#">AAP55795</a>                  | <a href="https://doi.org/10.1128/AAC.47.8.2464-2470.2003">https://doi.org/10.1128/AAC.47.8.2464-2470.2003</a>             | 1,3     |
| OMP25 | 3IQ2, Synthetic construct                  | Human cytoskeletal scaffolding proteins IQGAP3             | Protein sequence: TWLPAVIKIQAHWRGYRQRKIYL | <a href="https://doi.org/10.1016/j.biochi.2012.12.004">https://doi.org/10.1016/j.biochi.2012.12.004</a>                   | 1,2,3,4 |
| OMP26 | IR2, Synthetic construct                   | Protegrin-1                                                | Protein sequence: IRIRCRRRFCRIRI          | <a href="https://doi.org/10.1016/j.biomaterials.2014.06.005">https://doi.org/10.1016/j.biomaterials.2014.06.005</a>       | 1,2,3,4 |
| OMP27 | FR2, Synthetic construct                   | Protegrin-1                                                | Protein sequence: FRFRCRRRFCRFRF          | <a href="https://doi.org/10.1016/j.biomaterials.2014.06.005">https://doi.org/10.1016/j.biomaterials.2014.06.005</a>       | 1,3,4   |
| OMP28 | CEM1, Synthetic construct                  | MSI-78 ( <a href="#">AWS34388</a> )                        | Protein sequence: GIGKFLKKAKKF            | <a href="https://doi.org/10.1016/j.bbamem.2015.02.001">https://doi.org/10.1016/j.bbamem.2015.02.001</a>                   | 1,2,3,4 |
| OMP29 | LfcinB, Chain A, Lactoferricin             | <i>Bos taurus</i>                                          | <a href="#">1LFC A</a>                    | <a href="https://doi.org/10.1021/bi972323m">https://doi.org/10.1021/bi972323m</a>                                         | 1,2,4   |
| OMP30 | NRC-16, Pleurocidin-like peptide GC3.8     | <i>Glyptocephalus cynoglossus</i>                          | <a href="#">AAP55799</a>                  | <a href="https://doi.org/10.1128/AAC.47.8.2464-2470.2003">https://doi.org/10.1128/AAC.47.8.2464-2470.2003</a>             | 1,2,3   |
| OMP31 | TB_KKG6A, Synthetic construct              | Chain A, temporinB_KKG6A ( <a href="#">6GIJ A</a> )        | Protein sequence: KKLLPIVANLLKSSL         | <a href="https://doi.org/10.1038/s41598-018-37630-3">https://doi.org/10.1038/s41598-018-37630-3</a>                       | 1       |
| OMP32 | Dermaseptin S4L7KA14K, Dermaseptin-4       | Skin of <i>Phyllomedusa sauvagii</i>                       | <a href="#">P80280</a>                    | <a href="https://doi.org/10.1128/AAC.46.3.689-694.2002">https://doi.org/10.1128/AAC.46.3.689-694.2002</a>                 | 1,2,4   |
| OMP33 | Piscidin 119K, Chain A, Moronecidin        | Mast cells of                                              | <a href="#">2JOS A</a>                    | <a href="https://doi.org/10.1021/bi0620297">https://doi.org/10.1021/bi0620297</a>                                         | 1,2,3,4 |

|       |                                                      |                                                          |                                                            |                                                                                                           |         |
|-------|------------------------------------------------------|----------------------------------------------------------|------------------------------------------------------------|-----------------------------------------------------------------------------------------------------------|---------|
| OMP34 | Fowlicidin-2                                         | <i>Morone saxatilis</i>                                  | <a href="#">ADZ99029</a>                                   | <a href="https://doi.org/10.1002/btpr.2041">https://doi.org/10.1002/btpr.2041</a>                         | 1       |
| OMP35 | Cathelicidin-BF antimicrobial peptide                | Snake venom of <i>Bungarus fasciatus</i>                 | <a href="#">B6D434</a>                                     | <a href="https://doi.org/10.1371/journal.pone.0003217">https://doi.org/10.1371/journal.pone.0003217</a>   | 1,4     |
| OMP36 | E7K_I9K_IsCT, Chain A, Cytotoxic linear peptide IsCT | Scorpion venom of <i>Opisthacanthus madagascariensis</i> | <a href="#">1T52_A</a>                                     | <a href="https://doi.org/10.1016/j.bbrc.2004.08.144">https://doi.org/10.1016/j.bbrc.2004.08.144</a>       | 1,4     |
| OMP37 | PCNP, Polycationic nonapeptide, Synthetic construct  | <i>In silico</i> design                                  | Protein sequence:<br>KRRKKRRKKR<br><a href="#">1T52_A</a>  | <a href="https://doi.org/10.1128/mBio.01379-14">https://doi.org/10.1128/mBio.01379-14</a>                 | 1,3,4   |
| OMP38 | E7K_ISCT, Chain A, Cytotoxic linear peptide IsCT     | Scorpion venom of <i>Opisthacanthus madagascariensis</i> | <a href="#">ABQ53649.1</a>                                 | <a href="https://doi.org/10.1016/j.bbrc.2004.08.144">https://doi.org/10.1016/j.bbrc.2004.08.144</a>       | 1       |
| OMP39 | Dermcidin                                            | Sweat glands of humans                                   | <a href="#">ABQ53649.1</a>                                 | <a href="https://doi.org/10.1038/ni732">https://doi.org/10.1038/ni732</a>                                 | 1       |
| OMP40 | Bac7                                                 | Bovine neutrophils                                       | Protein sequence:<br>RRIRPRPPRLPRPRRPLPFPRPG<br>PRPIRPLPFP | <a href="https://doi.org/10.1021/jm501367p">https://doi.org/10.1021/jm501367p</a>                         | 1,3,4   |
| OMP41 | Epinecidin                                           | <i>Epinephelus coioides</i>                              | APM86638.1                                                 | <a href="https://dx.doi.org/10.3389%2Ffmicb.2019.02631">https://dx.doi.org/10.3389%2Ffmicb.2019.02631</a> | 1,2,3,4 |
| OMP42 | SSL-25, dermcidin-derived peptide                    | Human sweat                                              | Protein sequence:<br>SSLLEKGLDGAKKAVGGLG<br>KLGKDA         | <a href="https://doi.org/10.1016/j.bbamem.2017.09.004">https://doi.org/10.1016/j.bbamem.2017.09.004</a>   | 1,2,3,4 |
| Link1 | Flexible short linker                                | <i>In silico</i> design                                  | Protein sequence: AGAGAG                                   | /                                                                                                         | 1,2     |
| Link2 | Flexible median linker                               | <i>In silico</i> design                                  | Protein sequence:<br>GAGAGAGAGAGAGA                        | /                                                                                                         | 1       |
| Link3 | Rigid short helix                                    | <i>In silico</i> design                                  | Protein sequence:                                          | /                                                                                                         | 1,2     |
| Link4 | Rigid long helix                                     | <i>In silico</i> design                                  | LSRFFHAEL<br>Protein sequence:                             | /                                                                                                         | 1,2     |
| Link5 | Rigid long coil                                      | <i>In silico</i> design                                  | VFNQRKEHKGYMLA<br>Protein sequence:<br>IPQGRSHPVQPYPGAF    | /                                                                                                         | 1,2     |

|       |                                                |                                    |                                            |                                                                                                           |       |
|-------|------------------------------------------------|------------------------------------|--------------------------------------------|-----------------------------------------------------------------------------------------------------------|-------|
| Link6 | Rigid short coil                               | <i>In silico</i> design            | Protein sequence:                          | /                                                                                                         | 1,2   |
| Link7 | Rigid, optimal helix                           | <i>In silico</i> design            | PAVPPP<br>Protein sequence:                | /                                                                                                         | 1,2   |
| CBD1  | KZ144-CBD, CBD of endolysin KZ144              | <i>Pseudomonas</i> phage phiKZ     | EAAAKEAAKEAAK<br><a href="#">NP_803710</a> | <a href="https://doi.org/10.1006/jmbi.2001.5396">https://doi.org/10.1006/jmbi.2001.5396</a>               | 1,2,3 |
| CBD2  | EL188-CBD, CBD of endolysin EL188              | <i>Pseudomonas</i> phage EL        | <a href="#">YP_418221</a>                  | <a href="https://doi.org/10.1016/j.jmb.2005.08.075">https://doi.org/10.1016/j.jmb.2005.08.075</a>         | 2,3   |
| CBD3  | PVP-SE1gp146-CBD, CBD of endolysin PVP-SE1     | <i>Salmonella</i> phage PVP-SE1    | <a href="#">YP_004893952</a>               | <a href="https://doi.org/10.1128/JVI.01769-10">https://doi.org/10.1128/JVI.01769-10</a>                   | 1,2,3 |
| CBD4  | OBPgp279-CBD, CBD of endolysin OBP             | <i>Pseudomonas</i> phage OBP       | <a href="#">YP_004958186</a>               | <a href="https://doi.org/10.1128/JVI.06330-11">https://doi.org/10.1128/JVI.06330-11</a>                   | 2,3   |
| CBD5  | 201phi2-1gp229-CBD, CBD of endolysin 201phi2-1 | <i>Pseudomonas</i> phage 201phi2-1 | <a href="#">YP_001956952</a>               | <a href="https://doi.org/10.1016/j.virol.2008.04.004">https://doi.org/10.1016/j.virol.2008.04.004</a>     | 1,2,3 |
| CBD6  | KZ144-CBD w/ser                                | <i>Pseudomonas</i> phage phiKZ     | <a href="#">NP_803710</a>                  | <a href="https://doi.org/10.1006/jmbi.2001.5396">https://doi.org/10.1006/jmbi.2001.5396</a>               | 1,2,3 |
| EAD1  | PsP3gp10, EAD of endolysin PsP3                | <i>Salmonella</i> phage PsP3       | <a href="#">NP_958065</a>                  | <a href="https://doi.org/10.1016/0042-6822(91)90573-T">https://doi.org/10.1016/0042-6822(91)90573-T</a>   | 1,2,3 |
| EAD2  | P2gp09, EAD of endolysin P2gp09                | <i>Escherichia</i> phage P2        | <a href="#">NP_046765</a>                  | <a href="https://doi.org/10.1080/21597081.2016.1145782">https://doi.org/10.1080/21597081.2016.1145782</a> | 2,3   |
| EAD3  | K11gp3.5, EAD of endolysin K11                 | <i>Enterobacteria</i> phage K11    | <a href="#">AAX62800</a>                   | <a href="https://doi.org/10.1016/j.pep.2005.03.026">https://doi.org/10.1016/j.pep.2005.03.026</a>         | 1,2,3 |
| EAD4  | CR8gp3.5, EAD of endolysin CR8                 | <i>Citrobacter</i> phage CR8       | <a href="#">YP_009004176</a>               | <a href="https://doi.org/10.1128/genomeA.00146-14">https://doi.org/10.1128/genomeA.00146-14</a>           | 2,3   |
| EAD5  | LUZ24gp67, EAD of endolysin LUZ24              | <i>Pseudomonas</i> phage LUZ24     | <a href="#">YP_001671940</a>               | <a href="https://doi.org/10.1016/j.virol.2008.04.038">https://doi.org/10.1016/j.virol.2008.04.038</a>     | 2,3   |
| EAD6  | BcepC6Bgp22, EAD of endolysin BcepC6B          | <i>Burkholderia</i> phage BcepC6B  | <a href="#">YP_024942</a>                  | Uniprot: <a href="#">AY605181</a>                                                                         | 1,2,3 |
| EAD7  | LysEC8, EAD of endolysin phAPEC8               | <i>Escherichia</i> phage phAPEC8   | <a href="#">YP_007348465</a>               | <a href="https://doi.org/10.1128/JVI.02374-12">https://doi.org/10.1128/JVI.02374-12</a>                   | 1,2,3 |
| EAD8  | KZ144-EAD, EAD of endolysin KZ144              | <i>Pseudomonas</i> phage phiKZ     | <a href="#">NP_803710</a>                  | <a href="https://doi.org/10.1006/jmbi.2001.5396">https://doi.org/10.1006/jmbi.2001.5396</a>               | 2,3   |
| EAD9  | EL188-EAD, EAD of endolysin EL                 | <i>Pseudomonas</i> phage EL        | <a href="#">YP_418221</a>                  | <a href="https://doi.org/10.1016/j.jmb.2005.08.075">https://doi.org/10.1016/j.jmb.2005.08.075</a>         | 1,2,3 |
| EAD10 | PVP-SE1gp146-EAD, EAD of endolysin PVP-SE1     | <i>Salmonella</i> phage PVP-SE1    | <a href="#">YP_004893952</a>               | <a href="https://doi.org/10.1128/JVI.01769-10">https://doi.org/10.1128/JVI.01769-10</a>                   | 1,2,3 |

|       |                                                  |                                                           |                                |                                                                                                         |       |
|-------|--------------------------------------------------|-----------------------------------------------------------|--------------------------------|---------------------------------------------------------------------------------------------------------|-------|
| EAD11 | OBPgp279-EAD, EAD of endolysin OBP               | <i>Pseudomonas</i> phage OBP                              | <a href="#">YP_004958186</a>   | <a href="https://doi.org/10.1128/JVI.06330-11">https://doi.org/10.1128/JVI.06330-11</a>                 | 2,3   |
| EAD12 | 201Phi2-1gp229-EAD, EAD of endolysin 201phi2-1   | <i>Pseudomonas</i> phage 201phi2-1                        | <a href="#">YP_001956952</a>   | <a href="https://doi.org/10.1016/j.virol.2008.04.004">https://doi.org/10.1016/j.virol.2008.04.004</a>   | 1,2,3 |
| EAD13 | Acibel007, EAD of endolysin vB_AbaP_Acibel007    | <i>Acinetobacter</i> phage vB_AbaP_Acibel007              | <a href="#">YP_009103259</a>   | <a href="https://doi.org/10.1371/journal.pone.0104853">https://doi.org/10.1371/journal.pone.0104853</a> | 1,2,3 |
| EAD14 | vB_PsyM_KIL1gp019, EAD of endolysin vB_PsyM_KIL1 | <i>Pseudomonas</i> phage vB_PsyM_KIL1                     | <a href="#">YP_009276009</a>   | <a href="https://doi.org/10.3389/fmicb.2016.00279">https://doi.org/10.3389/fmicb.2016.00279</a>         | 1,2,3 |
| EAD15 | XccLys, EAD of endolysin Xcc                     | <i>Xanthomonas campestris</i> pv. <i>campestris</i> phage | Unpublished sequence           | -                                                                                                       | 1,2,3 |
| EAD16 | Shivanigp41, EAD of endolysin <i>Shivani</i>     | <i>Salmonella</i> phage Shivani                           | <a href="#">YP_009194685.1</a> | <a href="https://doi.org/10.1128/genomeA.01443-14">https://doi.org/10.1128/genomeA.01443-14</a>         | 1,2,3 |
| EAD17 | Vpept, EAD of endolysin VvAW1                    | <i>Vibrio</i> phage VvAW1                                 | <a href="#">YP_007518361</a>   | <a href="https://doi.org/10.4056/sigs.2846206">https://doi.org/10.4056/sigs.2846206</a>                 | 1,2,3 |
| EAD18 | KMVgp36C, VAPGH of phiKMV                        | <i>Pseudomonas</i> phage phiKMV                           | <a href="#">NP_877475</a>      | <a href="https://doi.org/10.1099/mic.0.28431-0">https://doi.org/10.1099/mic.0.28431-0</a>               | 2,3   |
| EAD19 | KZgp181, VAPGH of phiKZ                          | <i>Pseudomonas</i> phage phiKZ                            | <a href="#">AAL83082</a>       | <a href="https://doi.org/10.1006/jmbi.2001.5396">https://doi.org/10.1006/jmbi.2001.5396</a>             | 2,3   |
| EAD20 | BcepC6Bgp16, VAPGH of BcepC6B                    | <i>Burkholderia</i> phage BcepC6B                         | <a href="#">YP_024936</a>      | Uniprot: <a href="#">AY605181</a>                                                                       | 2,3   |
| EAD21 | OBPgp276, VAPGH of OBP                           | <i>Pseudomonas</i> phage OBP                              | <a href="#">YP_004958183</a>   | <a href="https://doi.org/10.1128/JVI.06330-11">https://doi.org/10.1128/JVI.06330-11</a>                 | 2,3   |
| EAD22 | KP32gp15                                         | <i>Klebsiella</i> phage KP32                              | <a href="#">YP_003347533.1</a> | <a href="https://doi.org/10.1007/s00253-012-4294-7">https://doi.org/10.1007/s00253-012-4294-7</a>       | 2,3   |
| EAD40 | OBPgp149                                         | <i>Pseudomonas fluorescens</i> phage                      | <a href="#">YP_004958056.1</a> | <a href="https://doi.org/10.1128/jvi.06330-11">https://doi.org/10.1128/jvi.06330-11</a>                 | 2,3   |
