# Supplementary material for: Rapid and High-Throughput Evaluation of Diverse Configurations of Engineered Lysins Using the VersaTile Technique
Source: MDPI journal article supplement (doi:10.3390/antibiotics10030293), 2021-03-11
Supplement: s1 [file s1]

**Table S5. A list of the sequenced active constructs of configuration 4, supplemented with the sequences and numbers of their separate tiles and the growth inhibition percentages in absence and presence of EDTA.**

| Nr | CBD                | EAD               | Linker                | OMP                                   | CBD  | EAD   | Linker | OMP   | GI% without EDTA | GI% with EDTA |
|----|--------------------|-------------------|-----------------------|---------------------------------------|------|-------|--------|-------|------------------|---------------|
| 1  | PVP-SE1gp146-CBD   | EL188-EAD         | Flexible short linker | Sarcotoxin IA                         | CBD3 | EAD9  | link1  | OMP11 | 98               | 95            |
| 2  | 201phi2-1gp229-CBD | XccLys            | Rigid long helix      | Sarcotoxin IA                         | CBD5 | EAD15 | link4  | OMP11 | 96               | 67            |
| 3  | PVP-SE1gp146-CBD   | vB_PsyM_KIL1gp019 | Flexible short linker | Sushi 1                               | CBD3 | EAD14 | link1  | OMP16 | 96               | 56            |
| 4  | KZ144-CBD          | XccLys            | Flexible short linker | TP4                                   | CBD1 | EAD15 | link1  | OMP18 | 95               | 87            |
| 5  | KZ144-CBD          | XccLys            | Flexible short linker | TP4                                   | CBD1 | EAD15 | link1  | OMP18 | 92               | 95            |
| 6  | 201phi2-1gp229-CBD | K11gp3.6          | Rigid short coil      | Piscidin-like peptide                 | CBD5 | EAD3  | link6  | OMP21 | 38               | 98            |
| 7  | KZ144-CBD          | Acibel007         | Rigid long coil       | 3IQ2                                  | CBD1 | EAD13 | link5  | OMP25 | 95               | 97            |
| 8  | KZ144-CBD w/ser    | PVP-SE1gp146-EAD  | Rigid long coil       | PAM2                                  | CBD6 | EAD10 | link5  | OMP23 | 65               | 97            |
| 9  | PVP-SE1gp146-CBD   | K11gp3.5          | Rigid long helix      | SSL-25                                | CBD3 | EAD3  | link4  | OMP42 | 97               | 98            |
| 10 | KZ144-CBD          | EL188-EAD         | Flexible short linker | FR2                                   | CBD1 | EAD9  | link1  | OMP27 | 15               | 96            |
| 11 | 201phi2-1gp229-CBD | vB_PsyM_KIL1gp019 | Rigid short helix     | LfcinB                                | CBD5 | EAD14 | link3  | OMP29 | 59               | 97            |
| 12 | KZ144-CBD          | XccLys            | Rigid long helix      | Indolicidin                           | CBD1 | EAD15 | link4  | OMP4  | 95               | 97            |
| 13 | PVP-SE1gp146-CBD   | Acibel007         | Rigid long helix      | Dermaseptin S4L7KA14K                 | CBD3 | EAD13 | link4  | OMP32 | 93               | 98            |
| 14 | KZ144-CBD          | PsP3gp10          | Rigid long coil       | Cathelicidin-BF antimicrobial peptide | CBD1 | EAD1  | link5  | OMP35 | 90               | 96            |
| 15 | KZ144-CBD          | PVP-SE1gp146-EAD  | Flexible short linker | Cathelicidin-BF antimicrobial peptide | CBD1 | EAD10 | link1  | OMP35 | 95               | 98            |
| 16 | 201phi2-1gp229-CBD | EL188-EAD         | Rigid long helix      | Cathelicidin-BF antimicrobial peptide | CBD5 | EAD9  | link4  | OMP35 | 96               | 94            |
| 17 | PVP-SE1gp146-CBD   | EL188-EAD         | Rigid long coil       | Cathelicidin-BF antimicrobial peptide | CBD3 | EAD9  | link5  | OMP35 | 36               | 97            |
| 18 | KZ144-CBD w/ser    | Acibel007         | Rigid long coil       | Cathelicidin-BF antimicrobial peptide | CBD6 | EAD13 | link5  | OMP35 | 97               | 38            |
| 19 | 201phi2-1gp229-CBD | vB_PsyM_KIL1gp019 | Rigid long coil       | Cathelicidin-BF antimicrobial peptide | CBD5 | EAD14 | link5  | OMP35 | 96               | 96            |
| 20 | KZ144-CBD w/ser    | Vpept             | Rigid long helix      | Cathelicidin-BF antimicrobial peptide | CBD6 | EAD17 | link4  | OMP35 | 95               | 58            |

|    |                    |          |                  |                                          |      |      |       |       |    |    |
|----|--------------------|----------|------------------|------------------------------------------|------|------|-------|-------|----|----|
| 21 | 201phi2-1gp229-CBD | K11gp3.7 | Rigid long helix | Cathelicidin-BF<br>antimicrobial peptide | CBD5 | EAD3 | link4 | OMP35 | 65 | 95 |
|----|--------------------|----------|------------------|------------------------------------------|------|------|-------|-------|----|----|

---
